# Supplementary material
Source: Elsevier journal article supplement (https://www.sciencedirect.com/science/article/pii/S0001651921000832)
Supplement: mmc1 [file S0001651921000832:mmc1.docx]

**Fig. 1.** Lista de verificación de RM del oído. NHC, número de historia clínica. Gd, gadolinio. LCR, líquido cefalorraquídeo. ACI, arteria carótida interna. VYI, vena yugular interna. CAI, conducto auditivo interno. AICA, arteria cerebelosa anteroinferior. PICA, arteria cerebelosa posteroinferior.

**Fig. 2.** A, B cortes axiales de un oído derecho. Secuencia hiperpotenciada en T2 (A) y secuencia en T1 (B) a la altura del conducto auditivo interno, donde se objetiva ausencia de lesiones ocupantes de espacio en oído medio, lo cual se traduce en una gran zona hipointensa (asteriscos). C, secuencia T2, corte coronal de ambos oídos donde se observa ausencia de herniación del tejido cerebral o líquido cefalorraquídeo (flecha negra) y ausencia de ocupación en oído medio derecho (asterisco). Oído medio izquierdo ocupado por material hiperintenso (flecha blanca). V, vestíbulo. CSL, conducto semicircular lateral. CSP, conducto semicircular posterior. CSS, conducto semicircular superior. MOT, médula ósea trabecular ocupando las celdillas del ápex petroso.

**Fig. 3.** Secuencias hiperpotenciadas en T2. A, corte axial a la altura de las espira media y apical en un paciente con un neurinoma acústico del oído derecho. Se observan las rampas timpánica y vestibular con alta señal, mientras que el conducto coclear aparece como una línea negra localizada entre las mismas (flecha blanca grande). Flechas negras, VI PC. B, corte coronal donde también se puede comprobar la permeabilidad de la cóclea de forma bilateral (C). C, corte axial de ambos oídos. Presencia de acueducto vestibular dilatado en el lado derecho (flecha gruesa). CSP, conducto semicircular posterior. C, cóclea.

**Fig. 4.** A, corte axial con secuencia hiperpotenciada en T2. Corte discretamente oblicuo a nivel del acueducto coclear (AC) en el oído derecho y del conducto auditivo interno en el oído izquierdo, lo que permite visualizar tanto la porción vertical de la arteria carótida interna (flecha gruesa blanca) como su porción horizontal (flechas blancas). B y C, secuencias con contraste, que permiten una mejor identificación de las porciones horizontal (B) y vertical (C) de la arteria carótida interna (flechas negras con borde blanco).

**Fig. 5.** A. Corte axial de un oído derecho. Secuencia T1 con contraste. Se identifica cómo el seno sigmoide se continua con el golfo de la yugular (GY), ocupando la pars vascular del foramen yugular. El ligamento petro-occipital (flechas blancas) separa este espacio del compartimento anterior, pars nerviosa, donde se pueden observar el trayecto de los pares craneales bajos (flechas negras con borde blanco). ACI, arteria carótida interna. Asterisco, oído medio. CAE, conducto auditivo externo. B, esquema que muestra la salida de los pares craneales VII y VIII a través del conducto auditivo interno, IX, X y XI a través del foramen yugular (junto con el golfo de la yugular en la porción vascular del mismo) y XII a través del canal condileo o del hipogloso. SPI, seno petroso inferior. En el dibujo de la derecha observamos la relación de los pares craneales con el ligamento petro-occipital.

**Fig. 6.** Secuencias hiperpotenciadas en T2. A, corte coronal de oído derecho donde se identifica la cresta horizontal o falciforme como ausencia de señal (flecha negra gruesa). B, esquema que muestra la relación que guardan entre sí los pares craneales VII y VIII en su trayecto a nivel del APC (A), poro acústico (B) y fundus (C). NF, nervio facial. NVC, nervio vestibulococlear. NC, nervio coclear. NV, tronco común del nervio vestibular. NVS, nervio vestibular superior. NVI, nervio vestibular inferior. C y D, cortes axiales a la altura del conducto auditivo interno de ambos oídos, en un plano inferior (C) y superior (D) del mismo. En C podemos observar el origen aparente de los nervios facial y vestibulococlear. Según progresan lateralmente, observamos cómo el vestibulococlear se divide en los nervios coclear, anteriormente y vestibular inferior, posteriormente. En un plano más superior del conducto auditivo interno (D) encontramos el nervio facial anteriormente y el nervio vestibular superior posteriormente. La línea punteada señala el nivel del poro acústico y la flecha blanca gruesa, el fundus. P, protuberancia. APC, ángulo pontocerebeloso. Flechas negras, bucle de la AICA en relación a los pares craneales VII y VIII.

**Fig. 7.** Cortes axiales de ambos oídos, secuencias hiperpotenciadas en T2. A, salida del origen aparente de los nervios facial (NF) y vestibulococlear (NVC) en íntima relación con el flóculo cerebeloso (FC). Se observa cómo sale la arteria cerebelosa anteroinferior (flechas blancas gruesas) de la arteria basilar (AB). B, corte a nivel más superior, donde se siguen observando las arterias cerebelosas anteroinferiores en su trayecto posterior, en relación a los pares craneales VII y VIII. También se identifica a este nivel el VI PC (flechas negras) en su trayecto hacia el canal de Dorello, en la porción anterior del ápex petroso. C, Corte axial a nivel del IV ventrículo (IV) y del foramen de Luschka (flecha blanca gruesa). Identificamos la salida de los pares craneales bajos IX o X (flecha blanca larga) en íntima relación con el flóculo cerebeloso, así como su trayecto lateral atravesando la cisterna cerebelomedular lateral (CCML) hacia el foramen yugular. Flecha negra gruesa, arteria cerebelosa posteroinferior. B, bulbo. C, cerebelo.

**Fig. 8.** Cortes axiales, secuencia hiperpotenciadas en T2. A, Identificamos las dos arterias vertebrales (AV), en relación con el XII PC (flechas negras), en su trayecto hacia el canal condileo o del hipogloso. CPB, cisterna prebulbar. B, bulbo. C, cerebelo. CM, cisterna magna. B, bucle de la arteria cerebelosa anteroinferior (flecha blanca gruesa) en oído derecho, que se introduce <50% en el interior del conducto auditivo interno (grado II de la clasificación de Chavda). En oído izquierdo se observa cómo la arteria cerebelosa anteroinferior no se introduce en el conducto auditivo interno (grado I de la clasificación de Chavda) (flecha blanca fina). Flecha negra gruesa, VI PC. AB, arteria basilar.

**MatSupl** **1.** Corte axial de un oído derecho. A, secuencia hiperpotenciada en T2. B, secuencia en T1 con gadolinio. Se descartan engrosamientos o captación patológica de contraste en la piel del conducto auditivo externo (CAE). OM, oído medio.

**MatSupl** **2.** Corte axial de un oído izquierdo, secuencia T1 con gadolinio. Hiperintensidad moderada a nivel de primera porción (1ª), ganglio geniculado (GG) y segunda porción (2ª) del nervio facial.

**MatSupl** **3.** Corte axial de un oído izquierdo. Secuencia hiperpotenciada en T2, donde se aprecia el acueducto coclear (flecha gruesa). AB, arteria basilar. Flecha punteada, arteria cerebelosa anteroinferior. FC, flóculo cerebeloso.

**MatSupl** **4.** Cortes axiales, secuencias hiperpotenciadas en T2. A. Se identifica el origen aparente del V PC saliendo de la región anterolateral de la protuberancia (flechas negras), en su camino hacia el ganglio de Gasser, localizado en el cavum de Meckel (asterisco). B. Entrada de las raíces del V PC en el cavum de Meckel (flecha blanca). P, protuberancia. CPB, cisterna prebulbar.

**MatSupl** **5.** Arterias cerebelosas superiores (flechas blancas) que emergen que de la arteria basilar.
